# Supplementary figures and images for: The Leuven Embedded Figures Test (L-EFT): measuring perception, intelligence or executive function?
Source: PeerJ journal article supplement (doi:10.7717/peerj.4524), 2018-03-26

# Histogram of peftdata[, 2]

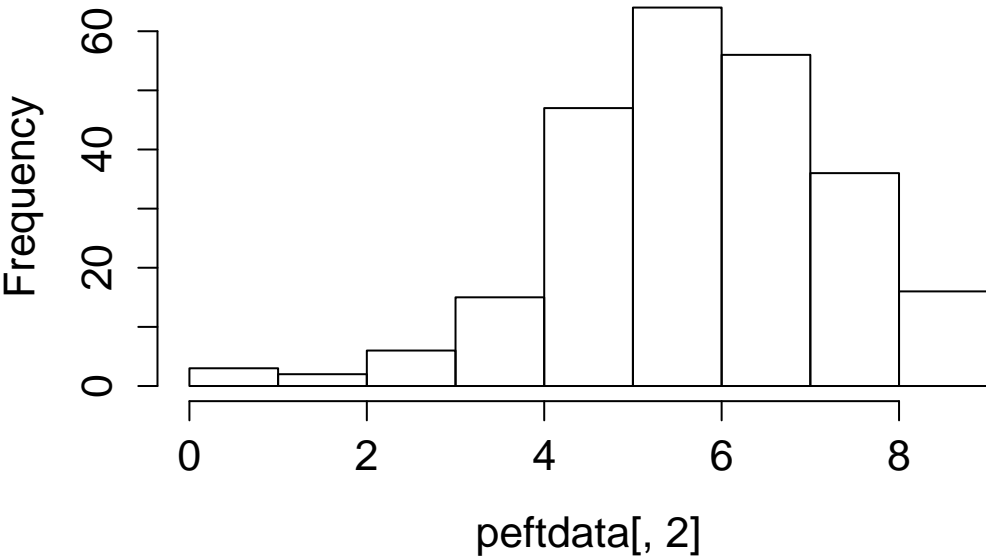

Supplement: Study_1.zip [file Study_1.zip]
